1 ***In vivo* structures of the *Helicobacter pylori* cag type IV secretion system**

2

3 Yi-Wei Chang<sup>1,†</sup>, Carrie L. Shaffer<sup>1,†,#</sup>, Lee A. Rettberg<sup>2</sup>, Debnath Ghosal<sup>1</sup>, Grant J. Jensen<sup>1,2\*</sup>

4

5 <sup>1</sup>Division of Biology and Biological Engineering, California Institute of Technology, Pasadena,  
6 CA 91125

7 <sup>2</sup>Howard Hughes Medical Institute, Pasadena, CA 91125

8 <sup>†</sup>These authors contributed equally to this work

9 <sup>#</sup>Present address, Department of Veterinary Science, University of Kentucky, Lexington, KY  
10 40546

11 \*Correspondence to: [jensen@caltech.edu](mailto:jensen@caltech.edu)

12

13

14

15

16 Running title: Structures of the *H. pylori* cag T4SS

## 17 **Summary**

18 The bacterial type IV secretion system (T4SS) is a versatile nanomachine that translocates diverse  
19 effector molecules between microbes and into eukaryotic cells. Using electron cryotomography,  
20 here we reveal the molecular architecture of the cancer-associated *Helicobacter pylori* *cag* T4SS.  
21 Although most components are unique to *H. pylori*, the *cag* T4SS exhibits remarkable architectural  
22 similarity to previously studied T4SSs. When *H. pylori* encounters host cells, however, the  
23 bacterium elaborates rigid, membranous tubes perforated by lateral ports. Dense, pilus-like rod  
24 structures extending from the inner membrane were also observed. We propose that the membrane  
25 tubes assemble out of the T4SS and are the delivery system for *cag* T4SS cargo. These studies  
26 reveal the architecture of a dynamic molecular machine that evolved to function in the human  
27 gastric niche.

## 28 **Introduction**

29 The type IV secretion system (T4SS) is a remarkably versatile molecular machine present in nearly  
30 all bacterial phyla and some archaeal species (1). Bacteria utilize T4SS to interact with prokaryotic  
31 and eukaryotic cells and to export an incredibly diverse repertoire of substrates (2). In most cases,  
32 T4SS activity is contact-dependent and results in delivery of nucleoprotein complexes and protein  
33 effectors directly into the target cell cytoplasm. By facilitating the exchange of genes and proteins  
34 among microbial populations and across kingdoms of life, the T4SS has accelerated bacterial  
35 evolution and resulted in species that thrive in diverse environments, including within plant and  
36 animal hosts (1, 3, 4).

37

38 T4SSs are used by a variety of pathogens during host colonization, including the gastric bacterium  
39 *Helicobacter pylori*. *H. pylori* may harbor up to four T4SSs, including the *cag* pathogenicity island  
40 (*cag*PAI)-encoded T4SS (*cag* T4SS) (5, 6); the *comB* T4SS that mediates DNA uptake from the  
41 extracellular environment (7); and two less well-characterized T4SSs, *tfs3* and *tfs4*, which are  
42 hypothesized to function in horizontal DNA transfer between bacteria (8). *H. pylori* exploit the  
43 *cag* T4SS to translocate a variety of effector molecules into gastric epithelial cells, including the  
44 oncoprotein CagA, fragments of peptidoglycan, chromosomally-derived DNA, and the  
45 lipopolysaccharide (LPS) biosynthesis metabolite heptose-1,7-bisphosphate (5, 9-11). These  
46 translocated effector molecules activate components of the innate immune system and dysregulate  
47 signaling pathways that significantly augment the risk of gastric cancer (12, 13).

48

49 Elegant studies analyzing the prototypical *vir* T4SS harbored by the phytopathogen *Agrobacterium*  
50 *tumefaciens* have provided valuable insight into T4SS biogenesis and function (1, 14). In addition,

51 recent work has provided architectural and structural information about several different T4SSs  
52 including the *Escherichia coli* conjugation *tra* T4SS (15, 16), the *A. tumefaciens vir* T4SS (17),  
53 the *Legionella pneumophila dot/icm* T4SS (18, 19), and the *H. pylori cag* T4SS (20). Among these,  
54 the *dot/icm* and *cag* effector translocator systems have many more genes than the *tra* and *vir* DNA-  
55 translocating systems, including many without obvious homologs in other bacteria (18-20). A so-  
56 called “core complex” of the *cag* T4SS has been purified and consists of Cag3, CagT, CagM, and  
57 two constituents that are orthologous to the VirB9/TraO (CagX) and VirB10/TraF (CagY) subunits  
58 of other systems (6, 20). When *H. pylori* contact the gastric cell surface, the bacterium produces  
59 filamentous structures that are dependent on multiple *cag* genes and have been termed *cag* T4SS  
60 pili (21-26). While *H. pylori* strains that fail to produce *cag* T4SS pili are unable to translocate  
61 cargo to host cells (22, 23, 25), the exact role of these filaments in *cag* T4SS activity and the  
62 relationship between the *cag* T4SS and the filaments remain unclear. In the current study, we  
63 applied electron cryotomography (ECT) to image frozen-hydrated *H. pylori* co-cultured with  
64 human gastric epithelial cells. We report structures of the intact *cag* T4SS *in vivo* and describe  
65 membranous tubes elaborated by *H. pylori* in response to the host cell. Together, these results  
66 suggest new hypotheses about the mechanism of the *cag* T4SS and roles of its components.

67

## 68 **Results**

69 ***H. pylori* develop membranous tube-like appendages in response to the host cell.** Since T4SS  
70 activity is stimulated by direct host cell contact, we sought to visualize the *cag* T4SS by imaging  
71 *H. pylori* in co-culture with human gastric epithelial cells. In order to avoid interference from  
72 flagella or flagellar motors in the analysis, we selected the *cagPAI*-positive, non-flagellated *H.*  
73 *pylori* strain 26695 for our studies. We cultured gastric epithelial cells on electron microscopy

74 grids, infected the grid-adherent monolayers with *H. pylori*, and plunge-froze the co-culture  
75 sample to preserve cellular features in a near-native state. We recorded ECT tilt-series (27) of  
76 regions of the sample where the bacteria were in direct contact or close proximity to epithelial cell  
77 elongations (Fig. 1A, B). In approximately 5% of the tomograms, we observed striking  
78 membranous tubes extending from the outer membrane of *H. pylori* cells (Fig. 1C, D) which were  
79 not observed in the absence of gastric epithelial cells (n = 464, Fig. S1). While this indicates that  
80 the tubes assemble in response to the host cell, we did not observe direct interaction of individual  
81 tubes with gastric epithelial cell surfaces (though we cannot rule out the possibility that longer  
82 tubes touched host cell surfaces beyond the imaging area of individual tomograms). Putative LPS  
83 densities, as observed on the cell surface, were clearly visible on the periphery of tube cross-  
84 sections, as were both leaflets of the membrane bilayer (Fig. 1D, inset). A thin layer of periodic  
85 densities lined the interior of the tubes, intimately associated with the inner leaflet of the bilayer,  
86 suggesting the presence of a regular protein support scaffold (Fig. 1E). The tubes appeared rigid  
87 and had membrane-outer-surface (not including LPS) and inner-channel (inside surface of  
88 scaffold) diameters of 37- and 22-nm, respectively (Fig. S2). Many tubes displayed pipe-like ports  
89 (median diameter 10 nm) along their lengths (Fig. 1F-I). In some cases, ports appeared to induce  
90 small bends in the tube (Fig. 1J), as if by wedging into the scaffold. The length of individual tubes  
91 produced by wild-type (WT) *H. pylori* ranged from 76 to 547 nm, with a median of 193 nm (n =  
92 18). To our surprise, the tubes were not associated with obvious basal body-like densities localized  
93 directly beneath the tube in the periplasm or the inner or outer membranes, suggesting that a  
94 dedicated membrane-bound apparatus is either not required for tube formation, not recognizable  
95 at the current resolution, or had disassembled prior to sample freezing.

96

97 To investigate whether the tubes were related to *cag* T4SS activity, we used ECT to image *H.*  
98 *pylori* lacking either the effector protein CagA, the *cag* T4SS pilus regulating protein CagH (22),  
99 or the entire *cag*PAI. ECT revealed tubes extending from the bacterial envelope when either *cagA*  
100 or *cagH* mutants were co-cultured with gastric cells (Fig. S2), but not the *cag*PAI strain. Under  
101 these conditions, tubes were produced by *H. pylori* proximal to a gastric cell in a total of 17 of 336  
102 tomograms across the analyzed strains. We visualized roughly equivalent numbers of tubes per  
103 cell produced by WT, *cagA*, and *cagH* strains (*cagA*, n = 22; *cagH*, n = 23). Two extremely long  
104 tubes (785 nm and 1311 nm) were observed in the *cagH* mutant (Fig. S3 shows the longest  
105 observed tube), and this strain also assembled a few tubes with larger outer and inner diameter  
106 dimensions (Fig. S2).

107  
108 ***In vivo* ultrastructure of the *cag* T4SS.** In some tomograms, we noticed dense, periplasmic, cone-  
109 shaped particles spanning the bacterial envelope near (but not directly below) membrane tubes  
110 (Fig. 2A, B). These structures were reminiscent of *L. pneumophila dot/icm* T4SS complexes  
111 observed *in situ* (19), and consisted of distinct layers of densities in the periplasmic space near the  
112 outer membrane (Fig. S4A, B). Based on the structural similarity to the *dot/icm* T4SS, we  
113 hypothesized that these structures corresponded to a T4SS. Close inspection of our tomograms  
114 revealed varying numbers of these particles in each *H. pylori* cell (ranging from 0 – 4 particles per  
115 cell in the field of view of the tomograms). The particles were found at cell poles as well as sides,  
116 consistent with previous reports analyzing *cag* T4SS components (21-24). In many instances, we  
117 observed the bacterial outer membrane bulging to accommodate the assembled particle. We also  
118 captured several top views of the structure which revealed two concentric rings. The outer ring  
119 exhibited 14-fold symmetry and a diameter of 40 nm (Fig. 2C), consistent with the structure of

120 immunopurified *cag* T4SS core complexes resolved earlier by negative stain electron microscopy  
121 (Fig. 4D) (20). Among the four potential T4SSs harbored by *H. pylori*, the imaged strain lacks  
122 complete *tfs3* and *tfs4* systems (8), and although the strain harbors the *comB* T4SS, corresponding  
123 cone-shaped particles were never observed in over 100 tomograms of the cognate *cagPAI* strain  
124 co-cultured with gastric epithelial cells, leading us to conclude that these particles are the *cag* T4SS  
125 rather than the *comB* DNA uptake or other T4SSs.

126

127 To investigate structural details of the *cag* T4SS, we sought to generate a subtomogram average.  
128 In initial averages, we were able to resolve clear structural features in the periplasm but not the  
129 cytoplasm. Given the inherent structural flexibility of other T4SSs (15, 19), we aligned and  
130 averaged the periplasmic and cytoplasmic regions separately and then generated a composite  
131 average (Fig. 2E; Fig. S4C). In the periplasm, we resolved a “hat” density associated with the outer  
132 membrane, several ring-like densities surrounding and beneath the hat, a central stalk, and wing-  
133 like densities on the periphery (Fig. S4C, E). Cross sections through the cytoplasmic apparatus  
134 revealed parallel lines of density (Fig. 2E-H), but because most of the *cag* T4SS particles used in  
135 the average were imaged from the side (electron beam parallel to the membranes), the average was  
136 smeared by the missing wedge effect in that direction. To interpret these densities, we therefore  
137 explored a variety of candidate structures by generating artificial tomograms smeared by the same  
138 missing wedge effect, and then compared their cross sections to the experimental data (Fig. S5).  
139 We tested configurations of one to six barrel densities and various combinations of barrel and rod  
140 structures. The best-matching model consisted of a short central barrel surrounded by four longer  
141 barrels, which together recapitulated the experimental results very well (Figs. 2E-H, 2K-P, S5).

142

143 **Sheathed cytoplasmic rod on the *cag* T4SS.** In three unusual *cag* T4SS particles (out of a total  
144 of 70 particles), we observed a dense, central rod extending from the outer membrane-associated  
145 complex into inner membrane invaginations with different depths (Fig. 3B-D, F-H). This feature  
146 was not observed previously in the *dot/icm* T4SS, nor in the purified R388 T4SS particles (15, 19).  
147 The rod and inner membrane invaginations measured ~10 nm and 30 nm in width, respectively,  
148 and the rod extended 45 – 120 nm from the outer membrane complex (Fig. 3B-D). Notably, in one  
149 of the particles, the rod appeared to project through the inner membrane into the cytoplasm, though  
150 the details were obscured by the crowded cytoplasm (Fig. 3D, H).

151  
152 **Comparison to previous T4SS structures.** The T4SS family is phylogenetically diverse, and has  
153 been divided into two major sub-types, type IVA and type IVB (T4ASS and T4BSS). Historically,  
154 T4ASSs have been classified according to protein homology to components of *E. coli tra* DNA  
155 conjugation systems (types F and P) and the *A. tumefaciens vir* T4SS, while T4BSSs exhibit  
156 protein sequence conservation to IncI-like conjugation systems and the *L. pneumophila dot/icm*  
157 T4SS (28). In most cases, T4ASSs are comprised of approximately 12 components with clear  
158 homology to Vir proteins, while T4BSSs incorporate many more proteins (twenty or more), and  
159 few share sequence homology with *vir* T4SS components (28). The *cag* T4SS has been considered  
160 a T4ASS since several Cag proteins share limited sequence similarity to Vir components (6, 28);  
161 however, the homologies are so weak their relevance is unclear, and the *cagPAI* encodes as many  
162 genes as a typical T4BSS, including many *H. pylori*-specific genes (6). Thus, the *cag* T4SS may  
163 represent a mosaic or hybrid T4SS subtype.

164



165 To explore the structural relationships between T4SSs, we compared the *cag* T4SS sub-tomogram  
166 average to the previous EM and crystallographic structures of purified sub-complexes of the R388  
167 (*I5*) (Fig. 4A, B), EM images of negatively-stained immuno-purified subcomplexes of the *cag*  
168 T4SS (Fig. 4C, D), and the subtomogram average of the *in vivo dot/icm* T4SS (*I9*) (Fig. 4E; Fig.  
169 S4E). In comparison to the R388 structures, the *cag* T4SS is similar in that it includes a large  
170 cluster of densities associated with the outer membrane, a stalk that connects the outer membrane-  
171 associated cap to the inner membrane, and structures in the cytoplasm anchored to the inner  
172 membrane (Fig 4A, G). The size and shape of the R388 outer-membrane-associated cluster  
173 (referred to in (*I6*) as the “core” complex, containing the C-termini of VirB7, VirB9, and VirB10)  
174 matched the hat and inner ring density below the hat (labelled  $\delta$  in Fig. S4E) in the *cag* T4SS  
175 structure (Fig. 4A, B, G, H, orange demarcation). Because CagY shares low-level homology to  
176 VirB10 (*6, 21*) and CagX shares low-level homology to VirB9 (*6, 29*) in those same C-terminal  
177 regions, we reason that these regions of CagX and CagY form the hat and the density labeled  $\delta$ .  
178 The size of the stalk and the configuration of the cytoplasmic barrels in the two structures,  
179 however, appear quite different.

180

181 In comparison to the images of the purified *cag* T4SS sub-complex comprised of CagM, CagT,  
182 CagX/VirB9, CagY/VirB10, and Cag3 (Fig. 4C, G, blue demarcation), the periplasmic portion of  
183 the *in vivo cag* T4SS average exhibited almost the exact size and general shape, which allowed us  
184 to definitively position and orient the negative stain result relative to the bacterial envelope.  
185 Comparison of the particle top views (Fig. 4D, H) also revealed striking structural similarities,  
186 including in the sizes of the concentric rings and their 14-fold symmetry (Fig. 4D, H) (note that  
187 the relative contrast of features in images of negatively stained proteins can depend on surface

188 chemistry and stain accumulation, so the shapes and arrangement of densities are the important  
189 properties to compare rather than grey-levels). These observations further confirm that the particles  
190 averaged in this study are the *cag* T4SS. From this comparison, and based on previous  
191 experimental evidence (20), we conclude that CagT, Cag3, and CagM must produce the densities  
192 inside the blue outline but outside the orange in Figure 4G (which were already assigned to  
193 CagX/VirB9 and CagY/VirB10). CagT and Cag3 can be further pin-pointed as the upper and  
194 lower outer rings ( $\alpha$  and  $\beta$  in Fig. S4E) based on the published negative-stain images of the CagX,  
195 CagY, and CagM sub-complex (20), which are missing those rings (though which is the upper and  
196 which is the lower ring or if they are mixed remains unclear). By elimination, this suggests CagM  
197 produces the density labeled  $\gamma$  in Fig. S4E; however, CagM localization could be more complicated  
198 and so remains to be verified.

199  
200 Compared to the *in vivo dot/icm* T4SS structure, the *cag* T4SS structure is remarkably similar,  
201 considering the fact that the systems each comprise over 25 components and only a few share  
202 sequence homology (Fig. S6). Both structures exhibit (i) an outer-membrane associated hat; (ii)  
203 upper and lower outer ring-like densities surrounding the hat (labeled  $\alpha$  and  $\beta$  in Fig. S4E, F); (iii)  
204 a barrel-like  $\gamma$  density at the center of the structure; (iv) a central stalk; (v) weak, wing-like densities  
205 that extend from the inner membrane into the periplasm (Fig. S4C-F), and (vi) parallel elongated  
206 densities perpendicular to the membrane in the cytoplasm. While the upper and outer ring densities  
207 ( $\alpha$ ) superimpose well (Fig. 4G, right panel), a difference is that there are two densities in the lower  
208 ring of the *cag* T4SS (labeled  $\beta$  and  $\delta$  in Fig. S4E) versus only one (labelled  $\beta$  in Fig. S4F) in the  
209 *dot/icm* T4SS. Based on a recent report describing the structure of the *L. pneumophila dot/icm*  
210 coupling protein DotL (30), its predicted position within the secretion system just underneath the

211 IM (30), and its match in size and shape to the central barrel seen at the same location in the *H.*  
212 *pylori* subtomogram average, we speculate that the central barrel of the *cag* T4SS cytoplasmic  
213 density corresponds to the Cag5/VirD4 coupling protein (Fig. 4F, G, magenta demarcation; Fig.  
214 S6). The tentative positioning of Cag5 to the central barrel density of the cytoplasmic apparatus is  
215 further supported by recent work demonstrating that the VirD4 coupling protein is situated in the  
216 center of the R388 inner membrane complex between VirB4 barrels (31). Collectively, these data  
217 reveal that although the *cag* T4SS is phylogenetically distinct from both the R388 and the *dot/icm*  
218 T4SS, the gross architecture of these three T4SS machines is remarkably conserved.

219

## 220 **Discussion**

221 Here we have reported the structure of the *cag* T4SS and shown that when *H. pylori* are in  
222 proximity to host cells, the bacterium produces membranous tubes decorated with pipe-like ports.  
223 Multiple scanning electron microscopy (SEM) studies have shown that under similar conditions,  
224 *H. pylori* assembles extracellular filaments, but the drying and metal coating inherent to SEM  
225 obscured fine details (21-23, 25, 26). In previous papers, these structures have been referred to as  
226 “pili,” “*cag* T4SS-associated pili,” “filaments,” “extensions,” etc., but here we will refer to all of  
227 the previously observed structures as “SEM filaments” for clarity, and because we would like to  
228 use the word “pilus” for a single component of the structure (the rod) described below. We  
229 conclude that the membrane tubes visualized by ECT are the native form of the previously  
230 described SEM filaments for the following reasons. First, both the membrane tubes and SEM  
231 filaments were only seen when *H. pylori* was co-cultured with gastric epithelial cells. Second, in  
232 all cases both structures depended on the presence of the genes in the *cagPAI*. Third, one previous  
233 study interpreted the SEM filaments as proteinaceous pili covered by membrane sheaths (21).

234 Fourth, and most decisively, deletion of the CagH “molecular ruler” protein resulted in both longer  
235 and wider membrane tubes and longer and wider SEM filaments (22). Concerning size,  
236 unfortunately the different SEM studies reported substantially different diameters for the SEM  
237 filaments, ranging from 15-70 nm (21-25). While this range does include the diameter of the native  
238 membrane tubes measured here (consistently 37 nm median diameter), we speculate that in the  
239 previous SEM studies, the extensive chemical fixation, dehydration, and metal coating inherent to  
240 the method may have introduced the variations.

241  
242 Previous SEM immuno-labeling experiments showed that CagY is present along the SEM  
243 filaments (21, 26) and CagT is clustered in ring-like formations at the SEM filaments’ base (21).  
244 Other immuno-labeling studies showed that additional Cag proteins could be localized to the SEM  
245 filaments, including CagA, CagL, CagT, and CagX (21, 23, 24, 26, 29). Comparisons of the T4SS  
246 structure obtained here with previous structures and images of purified complexes revealed that  
247 the conserved C-terminal region of CagY forms the central part of the “hat” density and that CagT  
248 forms part of the outer ring. Assuming CagX is a homolog of VirB9 as predicted (6, 29), CagX is  
249 also present in the hat density. Because both the *cag* T4SS and SEM filaments/membrane tubes  
250 have been associated with CagY, CagT, and CagX, we propose that the *cag* T4SS and the tubes  
251 are different states of the same secretion apparatus. In support of this, we note that the outer and  
252 inner diameters of the membrane tubes (37- and 22-nm, respectively) approximately match the  
253 outer and inner ring dimensions of the T4SS (41- and 19-nm, respectively).

254  
255 More specifically, we propose as a working hypothesis that the T4SS structure shown here (Fig.  
256 2E) is a “pre-extension” state that assembles in response to contact with a host cell (Fig. 5A). It is

257 known that the *E. coli tra* and *A. tumefaciens vir* T4SSs produce protein pili (Fig. 5B). In the *tra*  
258 system, the protein F pilus has an outer diameter of 8.7 nm and is formed by the major pilin  
259 TraA/VirB2, which is otherwise found in the inner membrane (32). The images shown in Fig. 3  
260 reveal that the *cag* T4SS also produces a rod-like structure with similar diameter, seen here in the  
261 periplasm. Upon receiving the proper signals, we therefore propose that the *cag* T4SS also  
262 assembles a protein pilus (the rod) from subunits in the inner membrane. This pilus may be formed  
263 of CagC, which exhibits weak homology to the VirB2/TraA component in the *vir* T4SS (25, 33,  
264 34). In our working model, we propose that as the pilus grows upwards from the IM, it interacts  
265 with components of the core complex within the periplasm, possibly opening a translocation  
266 channel through the system (1). At the onset of membrane tube formation, a conformational change  
267 within the core complex disengages the CagX/CagY hat which is released from the CagT/Cag3  
268 outer ring and extended tubes are produced by growth of the thin protein scaffold lining the inside  
269 tube surface (Fig. 5C). The tubes are stabilized by the CagT/Cag3 outer ring, which remains at the  
270 base like a collar, and the scaffold, which holds their diameter constant along their length. This  
271 scaffold may contain CagL, which has been proposed to be a functional homolog of the VirB5  
272 subunit (35) that is known to decorate the outside of the VirB2 T-pilus in *A. tumefaciens* (36, 37).  
273 If some part of CagL extended through the outer leaflet of the tube lipid bilayer, it would explain  
274 the observations that CagL can bind host cell integrins (23) and can be localized to the SEM  
275 filaments by immunogold labeling (23). CagI, which can also bind integrins (26) may also be part  
276 of the scaffold (22, 38). This model would explain why CagL and CagI deletion mutants have no  
277 SEM filaments (because tubes do not form in the absence of the scaffold) (22). Given that CagH  
278 is membrane-bound, plays an essential role in T4SS activity, regulates SEM filament/tube

279 dimensions, and forms a complex with CagL and CagI (22), CagH may control the incorporation  
280 of CagI and CagL into the scaffold (22, 38).

281

282 We propose that the CagX/CagY hat is a membrane fusion machine positioned at the tip of the  
283 tubes. Upon contact with a host cell, it fuses the tube and host membranes, opening a channel for  
284 the passage of effectors (Fig. 5D). Our interpretation of the tube ports is that they are open  
285 CagX/CagY channels, and this may explain the immuno-labeling results that CagY can be  
286 localized along the length of the SEM filaments (21, 26), and the observation that the C-  
287 terminal/VirB10 domain region of CagY can bind host integrins (26). While one CagX/CagY  
288 complex is positioned at the tip of the tube, other complexes present in the OM may be drawn  
289 upwards into the tube as it extends, or alternatively, additional CagX/CagY complexes may  
290 assemble in the tubes' lateral walls after extension. The interpretation that CagY is the membrane  
291 fusion protein could explain why strains lacking *cagY* form SEM filaments, but do not secrete  
292 effector molecules (24, 25), and is consistent with the proposal that CagY serves as a molecular  
293 switch that regulates secretion activity *in vivo* (24). In the imaged strains, the lateral ports exhibited  
294 a diameter of ~10-12 nm, which is large enough to facilitate transport of the folded CagA effector  
295 protein, whose dimensions measure 8 by 11 by 5.5 nm (39). One problem with this model is what  
296 happens to the IM transmembrane domain of CagY – given its tether to the IM, how would it  
297 remain at the tip of the extending tube? One possibility is that as the IM is perturbed by pilin  
298 subunits being loaded out of the IM and onto the base of the pilus, and as the pilus itself may  
299 incorporate IM lipids similar to *E. coli tra F* pili (32), the CagY tether is somehow released.  
300 Another possibility is that as CagY is ~1900 amino acids long, it spans the length of the tube.

301

302 Our interpretation of the three unusual T4SS particles with pili protruding downwards towards the  
303 cytoplasm (Fig. 3) is that these are stalled end-states in which the CagX/CagY hat failed to  
304 disengage the CagT/Cag3 ring, forcing pilus growth to push the IM downwards instead of the OM  
305 upwards. It may therefore be that the only states captured in cryotomograms are long-lived,  
306 including the pre-extension state (Fig. 5A), various stalled “failure to fire” states (Fig. 5C’), and  
307 terminal end states of tubes no longer connected to the host, leaving the tubes to reseal at the tip  
308 (Fig. 5E). Future studies will focus on earlier stages of the association and on bacteria directly  
309 touching host cells, in hopes of producing images of the hypothesized transitory states (Fig. 5B-  
310 D).

311

312 The role and fate of the pilus itself remains particularly unclear. While pilus growth might be  
313 involved in tube extension, a recent study revealed that SEM filaments can be produced by a strain  
314 lacking *cagC* (25), and it is also known that strains lacking *cagC* do not secrete *cag* T4SS effectors  
315 (25, 34). Perhaps there is some required interaction between the putative CagC pilus and the  
316 CagX/CagY hat that primes the hat for membrane fusion. Alternatively, as proposed for VirB2 in  
317 other type IVA systems (1), CagC may form a stable, rod-like translocation channel or pore  
318 through the periplasmic core complex into the base of the tube when the system is actively  
319 secreting effector molecules.

320

321 Assuming our model is correct, the *H. pylori cag* T4SS differs from the *E. coli tra* or *A. tumefaciens*  
322 *vir* systems in that the *cag* T4SS produces an extracellular appendage enclosed by outer membrane.  
323 Perhaps all T4SSs will share the basic central machinery that loads a VirB9/VirB10 membrane-  
324 fusion machine at the tip of an appendage (pilus or tube) that then extends to open a channel into

325 a host cell, but differ in the presence and roles of peripheral proteins that manage the OM's  
326 involvement in that appendage. Functionally, exposed protein pili may alone be sufficient to  
327 translocate single-stranded DNA (40), but wide membrane tubes like those seen here are likely  
328 required to translocate folded effector proteins into a host. Interestingly, some have already also  
329 proposed that membrane tubes are involved in DNA translocation as well (41, 42).

330

### 331 **Experimental Procedures**

332 **Bacterial strains and growth conditions.** *H. pylori* strain 26695 and corresponding mutants (22)  
333 were routinely maintained on Trypticase soy agar supplemented with 5% sheep blood (BD  
334 Biosciences) under microaerobic conditions. For all experiments, *H. pylori* were seeded into  
335 Brucella broth supplemented with 10% fetal bovine serum (FBS), and were grown overnight in  
336 shaking culture at 37°C, 5% CO<sub>2</sub>. Overnight bacterial cultures were normalized to an optical  
337 density at 600 nm (OD<sub>600</sub>) to ~0.3 in fresh Brucella broth supplemented with 10% FBS, and cells  
338 were grown to mid-log phase at 37°C, 5% CO<sub>2</sub> prior to generating samples for microscopy  
339 analysis.

340

341 **Human cell culture.** The gastric adenocarcinoma cell line AGS (ATCC CRL-1739) was  
342 maintained in RPMI 1640 medium supplemented with 10% FBS, 2 mM L-glutamine, and 10 mM  
343 HEPES buffer (complete RPMI). Cells were grown at 37°C in 5% CO<sub>2</sub>.

344

345 **Sample preparation for electron cryotomography.** AGS cells were seeded onto freshly glow  
346 discharged, UV sterilized Quantifoil gold Finder holey carbon grids (Quantifoil Micro Tools).  
347 AGS cells were added dropwise to the surface of the grid, and cells were grown overnight at 37°C



348 in 5% CO<sub>2</sub> to permit adherence to the grid. Grids were screened for cell confluency, and grids  
349 containing AGS cell clusters were inoculated with *H. pylori* at a multiplicity of infection (MOI)  
350 of approximately 50 bacterial cells per AGS cell. Co-culture samples were incubated in complete  
351 RPMI at 37°C in 5% CO<sub>2</sub> for 4.5 h prior to mixing with 20 nm colloidal gold beads (Sigma-  
352 Aldrich) that were pre-coated with bovine serum albumin. Grids were blotted and plunge-frozen  
353 in a liquid ethane/propane mixture (43) using an FEI Vitrobot Mark IV (Thermo Fisher Scientific),  
354 and were stored in liquid nitrogen prior to imaging.

355

356 **Electron cryotomography data collection and processing.** Frozen-hydrated samples were  
357 imaged in an FEI Polara 300 keV field emission gun transmission electron microscope (Thermo  
358 Fisher Scientific) equipped with a Gatan energy filter and a Gatan K2 Summit direct detector.  
359 Energy-filtered tilt-series of images of the cells were automatically collected from -60° to +60° at  
360 1° intervals using UCSF tomography data collection software (44), with a total dosage of 160 e-  
361 Å<sup>-2</sup> per tilt-series, a defocus of -6 μm and a pixel size of 3.9 Å. The images were aligned using  
362 the IMOD software package (45). SIRT reconstructions were then produced using the TOMO3D  
363 program (46). The *cag* T4SS structures were located by visual inspection. The sub-tomogram  
364 averages were produced using the PEET program (47) with local masks on either the periplasmic  
365 or cytoplasmic portion.

366

367 **Data availability.** The sub-tomogram averages of *cag* T4SS machinery that support the findings  
368 of this study have been deposited in the Electron Microscopy Data Bank (EMDB) with accession  
369 codes EMD-XXXX (aligned on the periplasmic region); EMD-XXXX (aligned on the cytoplasmic  
370 region).

371

372 **References**

- 373 1. P. J. Christie, K. Atmakuri, V. Krishnamoorthy, S. Jakubowski, E. Cascales, Biogenesis,  
374 architecture, and function of bacterial type IV secretion systems. *Annu Rev Microbiol* **59**,  
375 10.1146/annurev.micro.1158.030603.123630 (2005).
- 376 2. E. Cascales, P. J. Christie, The versatile bacterial type IV secretion systems. *Nature*  
377 *reviews. Microbiology* **1**, 137-149 (2003).
- 378 3. C. E. Alvarez-Martinez, P. J. Christie, Biological diversity of prokaryotic type IV secretion  
379 systems. *Microbiol Mol Biol Rev* **73**, 775-808 (2009).
- 380 4. V. Chandran Darbari, G. Waksman, Structural biology of bacterial type IV secretion  
381 systems. *Annu Rev Biochem* **84**, 603-629 (2015).
- 382 5. S. Odenbreit *et al.*, Translocation of *Helicobacter pylori* CagA into gastric epithelial cells  
383 by type IV secretion. *Science* **287**, 1497-1500 (2000).
- 384 6. W. Fischer, Assembly and molecular mode of action of the *Helicobacter pylori* Cag type  
385 IV secretion apparatus. *FEBS J* **278**, 1203-1212 (2011).
- 386 7. D. Hofreuter, S. Odenbreit, R. Haas, Natural transformation competence in *Helicobacter*  
387 *pylori* is mediated by the basic components of a type IV secretion system. *Mol Microbiol*  
388 **41**, 379-391 (2001).
- 389 8. E. Fernandez-Gonzalez, S. Backert, DNA transfer in the gastric pathogen *Helicobacter*  
390 *pylori*. *J Gastroenterol* **49**, 594-604 (2014).
- 391 9. S. Backert, N. Tegtmeyer, W. Fischer, Composition, structure and function of the  
392 *Helicobacter pylori* cag pathogenicity island encoded type IV secretion system. *Future*  
393 *Microbiol* **10**, 955-965 (2015).

- 394 10. M. G. Varga *et al.*, Pathogenic *Helicobacter pylori* strains translocate DNA and activate  
395 TLR9 via the cancer-associated *cag* type IV secretion system. *Oncogene*, (2016).
- 396 11. S. Zimmermann *et al.*, ALPK1- and TIFA-dependent innate immune response triggered by  
397 the *Helicobacter pylori* type IV secretion system. *Cell Rep* **20**, 2384-2395 (2017).
- 398 12. T. L. Cover, M. J. Blaser, *Helicobacter pylori* in health and disease. *Gastroenterology* **136**,  
399 1863-1873 (2009).
- 400 13. M. Amieva, R. M. Peek, Pathobiology of *Helicobacter pylori*-induced gastric cancer.  
401 *Gastroenterology* **150**, 64-78 (2016).
- 402 14. E. Cascales, P. J. Christie, Definition of a bacterial type IV secretion pathway for a DNA  
403 substrate. *Science* **304**, 1170-1173 (2004).
- 404 15. H. H. Low *et al.*, Structure of a type IV secretion system. *Nature* **508**, 550-553 (2014).
- 405 16. R. Fronzes *et al.*, Structure of a type IV secretion system core complex. *Science* **323**, 266-  
406 268 (2009).
- 407 17. J. E. Gordon *et al.*, Use of chimeric type IV secretion systems to define contributions of  
408 outer membrane subassemblies for contact-dependent translocation. *Mol Microbiol* **105**,  
409 273-293 (2017).
- 410 18. T. Kubori *et al.*, Native structure of a type IV secretion system core complex essential for  
411 *Legionella* pathogenesis. *Proc Natl Acad Sci U S A* **111**, 11804-11809 (2014).
- 412 19. D. Ghosal, Y. W. Chang, K. C. Jeong, J. P. Vogel, G. J. Jensen, *In situ* structure of the  
413 *Legionella* Dot/Icm type IV secretion system by electron cryotomography. *EMBO Rep* **18**,  
414 726-732 (2017).
- 415 20. A. E. Frick-Cheng *et al.*, Molecular and structural analysis of the *Helicobacter pylori* *cag*  
416 type IV secretion system core complex. *mBio* **7**, (2016).

- 417 21. M. Rohde, J. Puls, R. Buhrdorf, W. Fischer, R. Haas, A novel sheathed surface organelle  
418 of the *Helicobacter pylori* cag type IV secretion system. *Mol Microbiol* **49**, 219-234  
419 (2003).
- 420 22. C. L. Shaffer *et al.*, *Helicobacter pylori* exploits a unique repertoire of type IV secretion  
421 system components for pilus assembly at the bacteria-host cell interface. *PLoS Pathog* **7**,  
422 e1002237 (2011).
- 423 23. T. Kwok *et al.*, *Helicobacter* exploits integrin for type IV secretion and kinase activation.  
424 *Nature* **449**, 862-866 (2007).
- 425 24. R. M. Barrozo *et al.*, Functional plasticity in the type IV secretion system of *Helicobacter*  
426 *pylori*. *PLoS Pathog* **9**, e1003189 (2013).
- 427 25. E. M. Johnson, J. A. Gaddy, B. J. Voss, E. E. Hennig, T. L. Cover, Genes required for  
428 assembly of pili associated with the *Helicobacter pylori* cag type IV secretion system.  
429 *Infect Immun* **82**, 3457-3470 (2014).
- 430 26. L. F. Jimenez-Soto *et al.*, *Helicobacter pylori* type IV secretion apparatus exploits beta1  
431 integrin in a novel RGD-independent manner. *PLoS Pathog* **5**, e1000684 (2009).
- 432 27. C. M. Oikonomou, G. J. Jensen, A new view into prokaryotic cell biology from electron  
433 cryotomography. *Nat Rev Microbiol* **14**, 205-220 (2016).
- 434 28. K. Wallden, A. Rivera-Calzada, G. Waksman, Type IV secretion systems: versatility and  
435 diversity in function. *Cell Microbiol* **12**, 1203-1212 (2010).
- 436 29. J. Tanaka, T. Suzuki, H. Mimuro, C. Sasakawa, Structural definition on the surface of  
437 *Helicobacter pylori* type IV secretion apparatus. *Cell Microbiol* **5**, 395-404 (2003).
- 438 30. M. J. Kwak *et al.*, Architecture of the type IV coupling protein complex of *Legionella*  
439 *pneumophila*. *Nat Microbiol* **2**, 17114 (2017).

- 440 31. A. Redzej *et al.*, Structure of a VirD4 coupling protein bound to a VirB type IV secretion  
441 machinery. *EMBO J*, (2017).
- 442 32. T. R. Costa *et al.*, Structure of the bacterial sex F pilus reveals an assembly of a  
443 stoichiometric protein-phospholipid complex. *Cell* **166**, 1436-1444 e1410 (2016).
- 444 33. S. Kutter *et al.*, Protein subassemblies of the *Helicobacter pylori* Cag type IV secretion  
445 system revealed by localization and interaction studies. *J Bacteriol* **190**, 2161-2171 (2008).
- 446 34. J. Andrzejewska *et al.*, Characterization of the pilin ortholog of the *Helicobacter pylori*  
447 type IV *cag* pathogenicity apparatus, a surface-associated protein expressed during  
448 infection. *J Bacteriol* **188**, 5865-5877 (2006).
- 449 35. S. Barden *et al.*, A helical RGD motif promoting cell adhesion: crystal structures of the  
450 *Helicobacter pylori* type IV secretion system pilus protein CagL. *Structure* **21**, 1931-1941  
451 (2013).
- 452 36. E. M. Lai, C. I. Kado, Processed VirB2 is the major subunit of the promiscuous pilus of  
453 *Agrobacterium tumefaciens*. *J Bacteriol* **180**, 2711-2717 (1998).
- 454 37. H. Schmidt-Eisenlohr *et al.*, Vir proteins stabilize VirB5 and mediate its association with  
455 the T pilus of *Agrobacterium tumefaciens*. *J Bacteriol* **181**, 7485-7492 (1999).
- 456 38. K. T. Pham *et al.*, CagI is an essential component of the *Helicobacter pylori* Cag type IV  
457 secretion system and forms a complex with CagL. *PLoS One* **7**, e35341 (2012).
- 458 39. T. Hayashi *et al.*, Tertiary structure-function analysis reveals the pathogenic signaling  
459 potentiation mechanism of *Helicobacter pylori* oncogenic effector CagA. *Cell Host*  
460 *Microbe* **12**, 20-33 (2012).
- 461 40. A. C. Shu *et al.*, Evidence of DNA transfer through F-pilus channels during *Escherichia*  
462 *coli* conjugation. *Langmuir* **24**, 6796-6802 (2008).

- 463 41. T. F. Anderson, Recombination and segregation in *Escherichia coli*. *Cold Spring Harb*  
464 *Symp Quant Biol* **23**, 47-58 (1958).
- 465 42. T. F. Anderson, E. L. Wollman, F. Jacob, [Processes of conjugation and recombination in  
466 *Escherichia coli*. III. Morphological aspects in electron microscopy]. *Ann Inst Pasteur*  
467 *(Paris)* **93**, 450-455 (1957).
- 468 43. W. F. Tivol, A. Briegel, G. J. Jensen, An improved cryogen for plunge freezing. *Microsc*  
469 *Microanal* **14**, 375-379 (2008).
- 470 44. S. Q. Zheng *et al.*, UCSF tomography: an integrated software suite for real-time electron  
471 microscopic tomographic data collection, alignment, and reconstruction. *J Struct Biol* **157**,  
472 138-147 (2007).
- 473 45. J. R. Kremer, D. N. Mastronarde, J. R. McIntosh, Computer visualization of three-  
474 dimensional image data using IMOD. *J Struct Biol* **116**, 71-76 (1996).
- 475 46. J. I. Agulleiro, J. J. Fernandez, Fast tomographic reconstruction on multicore computers.  
476 *Bioinformatics* **27**, 582-583 (2011).
- 477 47. D. Nicastro *et al.*, The molecular architecture of axonemes revealed by cryoelectron  
478 tomography. *Science* **313**, 944-948 (2006).

479

## 480 **Acknowledgements**

481 We thank Dr. Tim Cover (Vanderbilt) for providing *H. pylori* strains and Dr. Maria  
482 Hadjifrangiskou (Vanderbilt) for helpful discussions. This work was supported by NIH grant R01  
483 AI127401 to G.J.J., NIH grant F32 DK105720 to C.L.S., NIH grant 5 T32 A1007474-19 to C.L.S,  
484 and the Burroughs Wellcome Fund 2016 Collaborative Research Travel Grant to C.L.S.

485

486 **Author contributions**

487 Y.-W.C, C.L.S. and L.A.R. prepared the samples. Y.-W.C collected and processed the electron  
488 cryotomography data and generated the subtomogram averages. Y.-W.C, C.L.S., L.A.R. and D.G.  
489 analyzed the electron cryotomography data. G.J.J supervised the project. Y.-W.C., C.L.S. and  
490 G.J.J. wrote the paper with input from all authors.

491 **Figures**

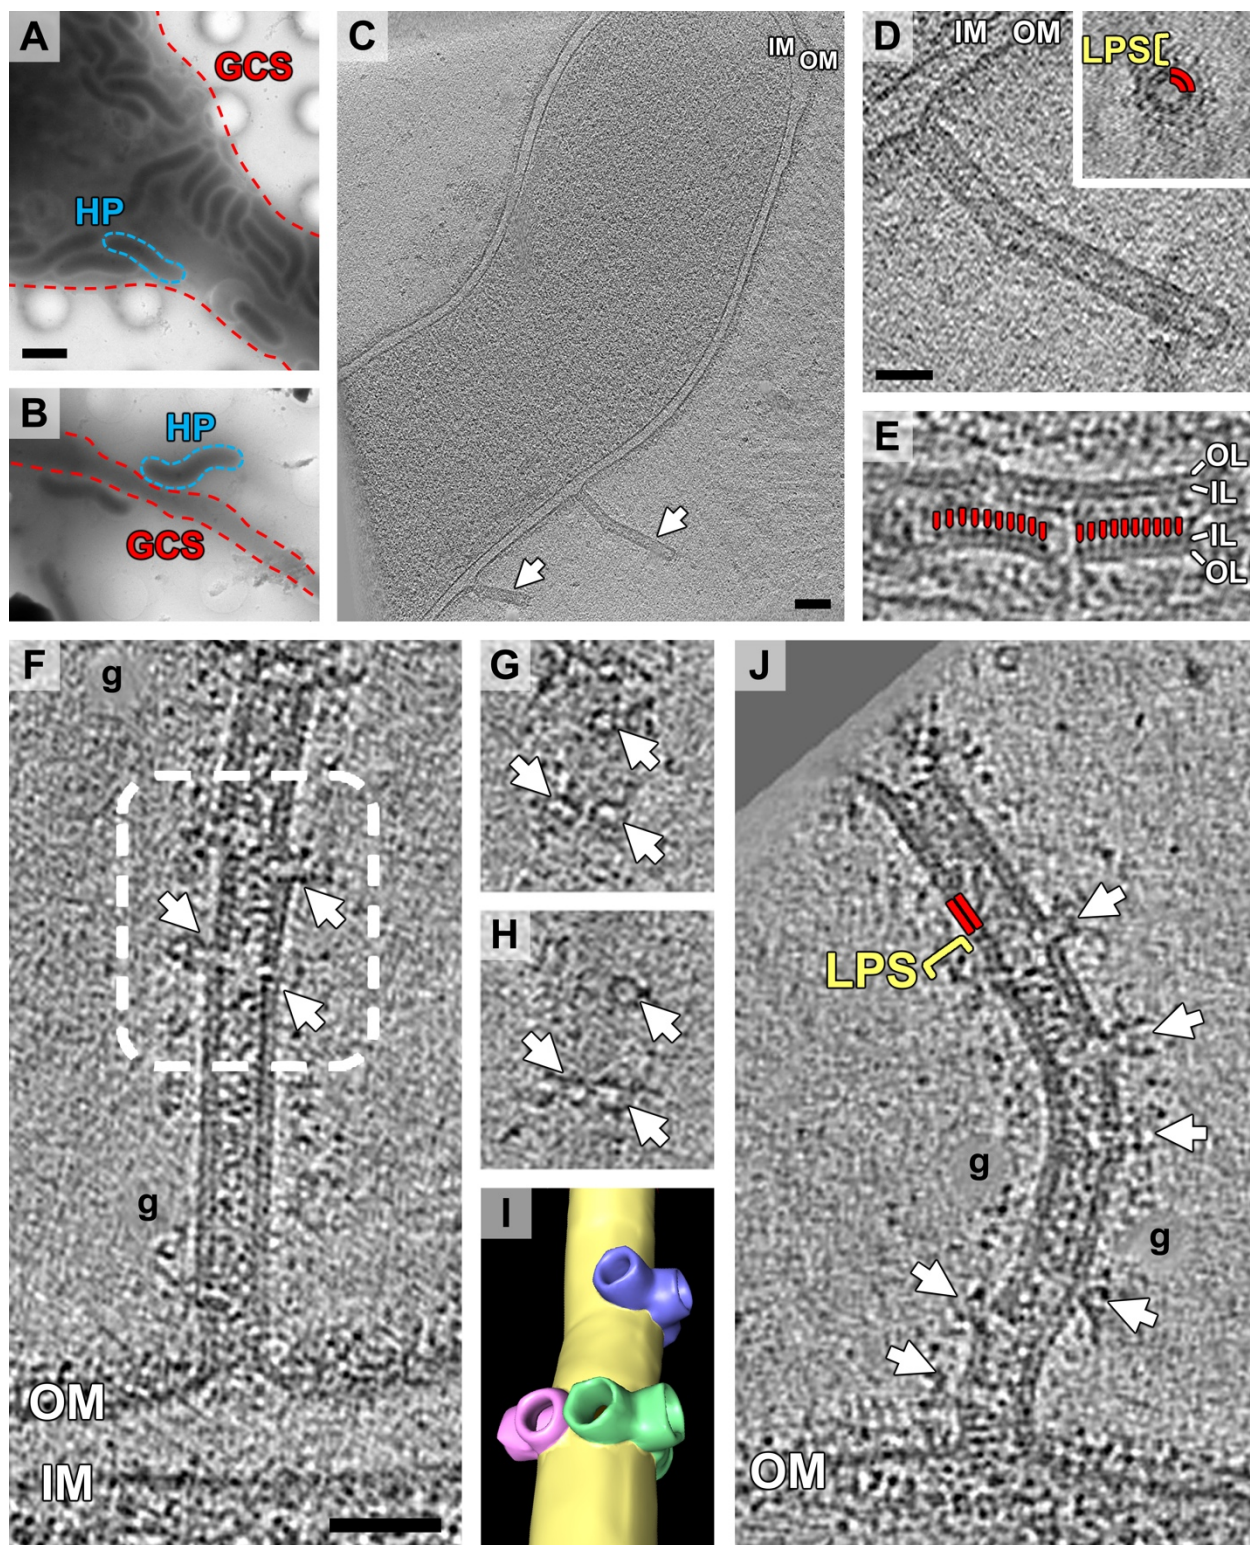



493 **Figure 1. *H. pylori* assembles membranous tubes when in proximity to gastric epithelial cells.**

494 (A and B) Low magnification views of gastric epithelial cells grown on electron microscopy grids  
495 and infected with *H. pylori*. Blue dashed lines indicate examples of adherent *H. pylori* cells (HP)  
496 interacting with gastric cell surfaces (GCS; Red dashed lines) that were imaged by ECT. (C)  
497 Tomographic slice through WT *H. pylori* cell co-cultured with gastric epithelial cells. White  
498 arrows point to membrane tubes extending from the *H. pylori* cell envelope. (D) Enlarged view of  
499 the longer tube shown in C. Inset, cross-section of a membrane tube. The two leaflets of the tube's  
500 membrane bilayer are labeled by two red lines; the region of lipopolysaccharide (LPS) is indicated  
501 by a yellow bracket. (E) Periodic densities lining the inside of the tube (labeled by red lines). (F)  
502 An individual tube displaying lateral ports (white arrows). (G and H) Distal and proximal cross  
503 sections of ports within the boxed region of the tube depicted in F. (I) 3D segmentation of the  
504 boxed region of the tube depicted in F. (J) The presence of lateral ports appears to induce a slight  
505 bending of the tube. The two leaflets of the tube and lipopolysaccharide densities decorating the  
506 surface are labeled as in D. The locations of erased gold fiducials during tomogram reconstruction  
507 are labeled with "g". Scale bar in (A), 2  $\mu\text{m}$ , applies to (A) and (B); (C) 100 nm; (D) 50 nm; (F)  
508 50 nm, applies to (E-H) and (J). OM, outer membrane; IM, inner membrane; OL, outer leaflet; IL,  
509 inner leaflet.

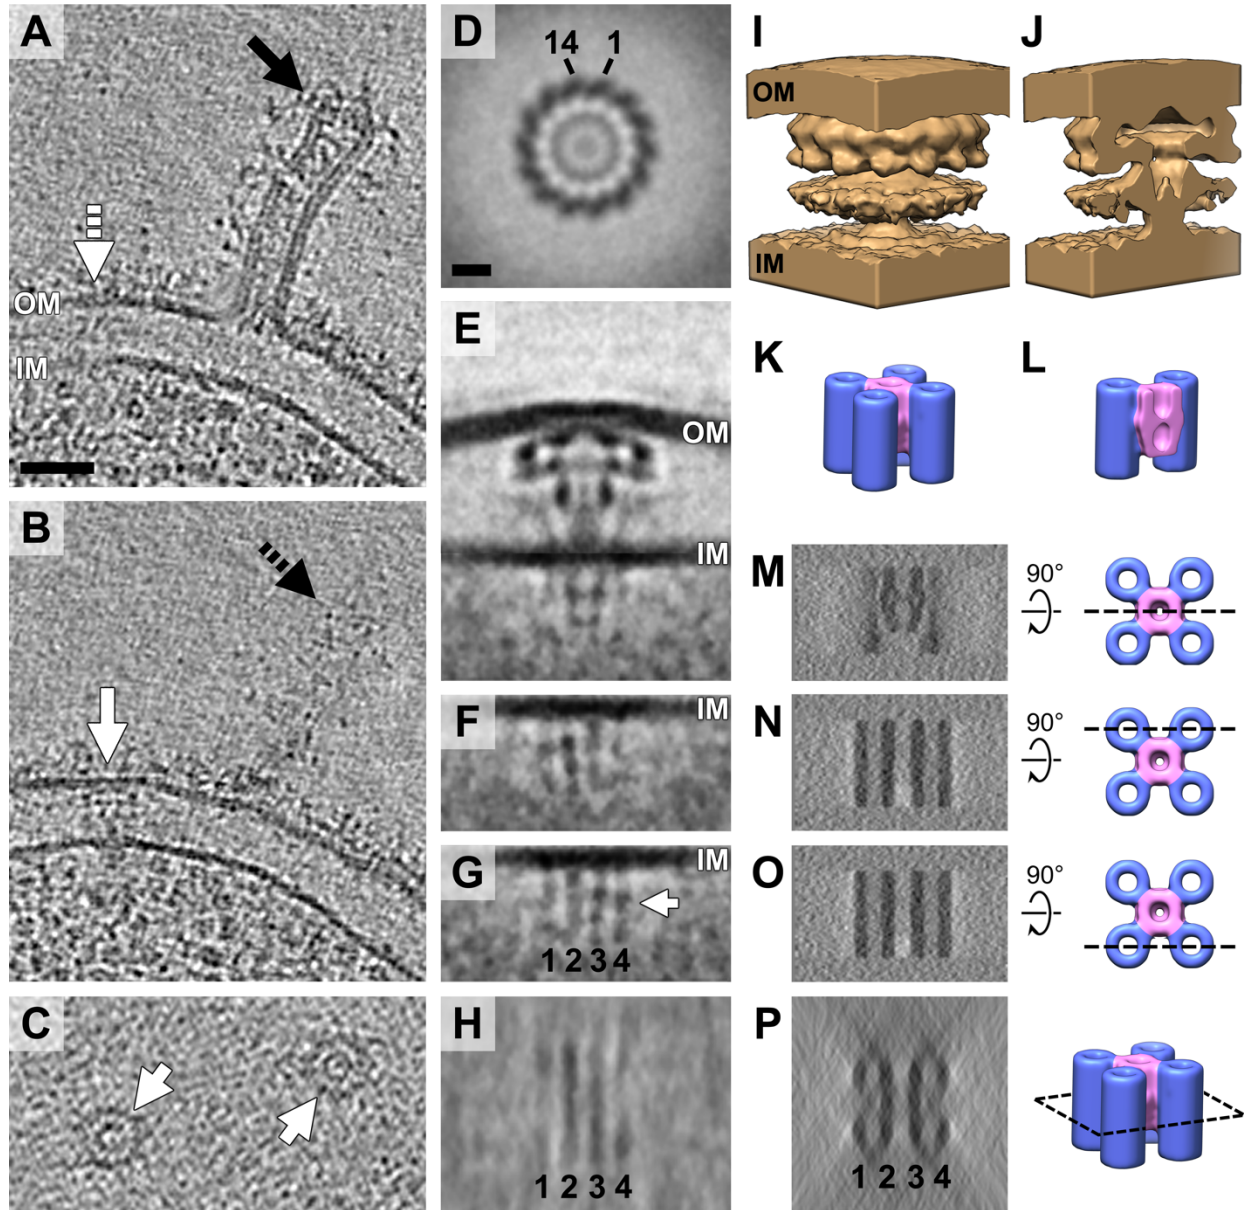

510

511 **Figure 2. *In vivo* structure of the *cag* T4SS.** (A and B) Different tomographic slices of the same  
 512 region of the bacterial envelope identifying a *cag* T4SS particle (white arrow) adjacent to a tube-  
 513 like appendage (black arrow). Dashed arrows represent the position of the tube and *cag* T4SS  
 514 particle in the other tomographic slice. (C) Top views of individual *cag* T4SS particles (white  
 515 arrows). (D) Top view of the subtomogram average of *cag* T4SS reveals 14-fold symmetry.  
 516 Numbers indicate the clockwise count of individual subunits visible in the ring structure. (E)  
 517 Central slice through the side view of the composite subtomogram average of the *cag* T4SS.

518 Averages aligned on the periplasmic and cytoplasmic parts are stitched using the inner membrane  
519 as the boundary. (F) Distal and (G) proximal off-center tomographic slices of the cytoplasmic  
520 apparatus from the side view reveal four distinct rod-like densities. (H) A top view of the  
521 cytoplasmic apparatus at the level of the white arrow in G shows two central lines and four corner  
522 densities. (I, J) 3D representation (I) and cut-away view (J) of the *cag* T4SS periplasmic structure.  
523 (K, L) 3D representation (K) and cut-away view (L) of the predicted five-barrel structure of the  
524 cytoplasmic apparatus. The shorter central barrel is colored light pink. (M-P) Simulated  
525 tomograms of the five-barrel model of the cytoplasmic apparatus corresponding to tomographic  
526 slices E (M), F (N), G (O), and H (P). The position of each predicted tomographic slice is indicated  
527 in the views of the five-barrel model to the right. Scale bar in (A) 50 nm, applies to (A-C); (D) 10  
528 nm, applies to (D-H). OM, outer membrane; IM, inner membrane.

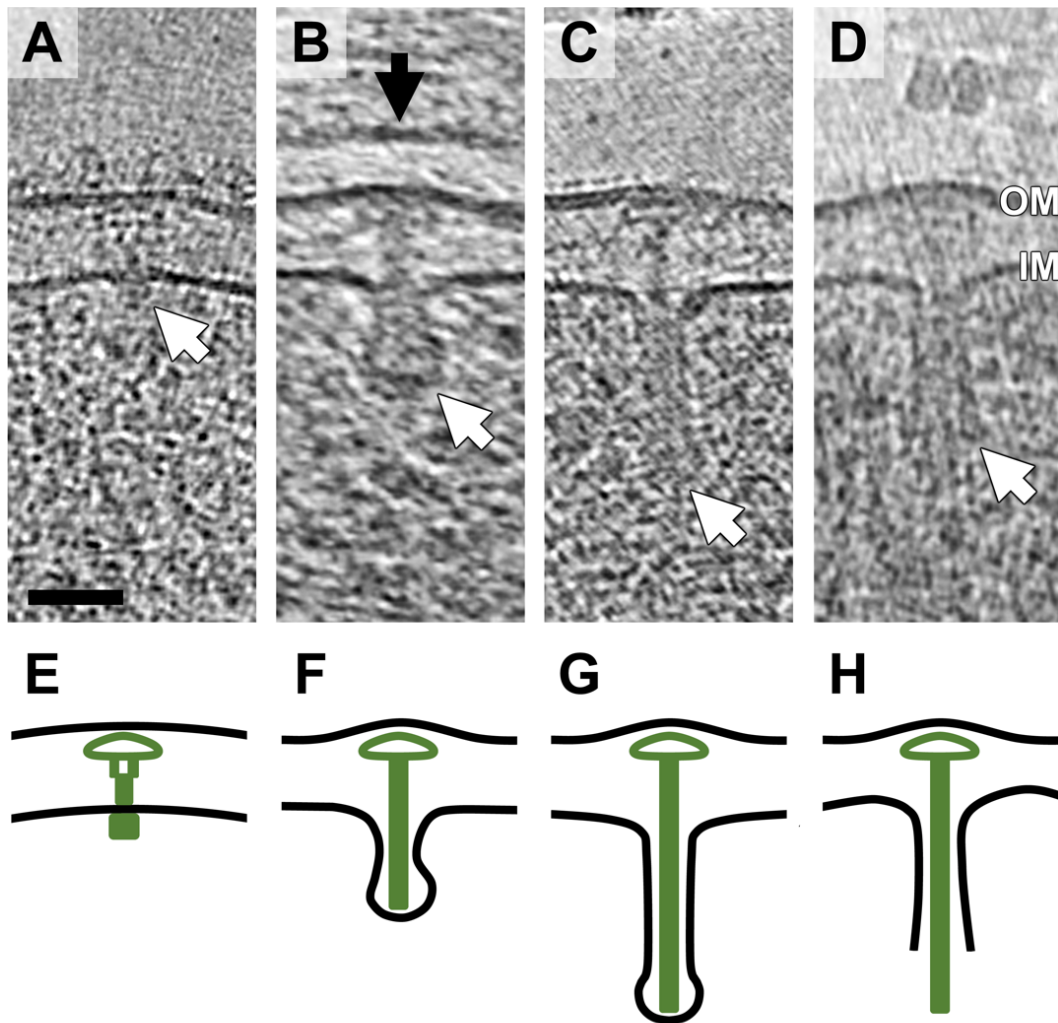

529

530 **Figure 3. Pilus-like rods emerging from the *cag* T4SS.** (A) A *cag* T4SS particle exhibiting a  
531 typical cytoplasmic structure (white arrow). (B) A *cag* T4SS particle with a pilus-like rod density  
532 surrounded by an inner membrane invagination (white arrow). The gastric epithelial cell plasma  
533 membrane (black arrow) is visible directly above the bacterial outer membrane. (C) A *cag* T4SS  
534 particle with an extended pilus-like rod density and inner membrane sheath (white arrow). (D) A  
535 *cag* T4SS particle with an even longer pilus-like rod density. The inner membrane appears to have  
536 ruptured (white arrow). (E-H) Schematic interpretation of the *cag* T4SS apparatus conformation  
537 in A (E), B (F), C (G), and D (H). Scale bar in (A) 50 nm, applies to (A-D). OM, outer membrane;  
538 IM, inner membrane.

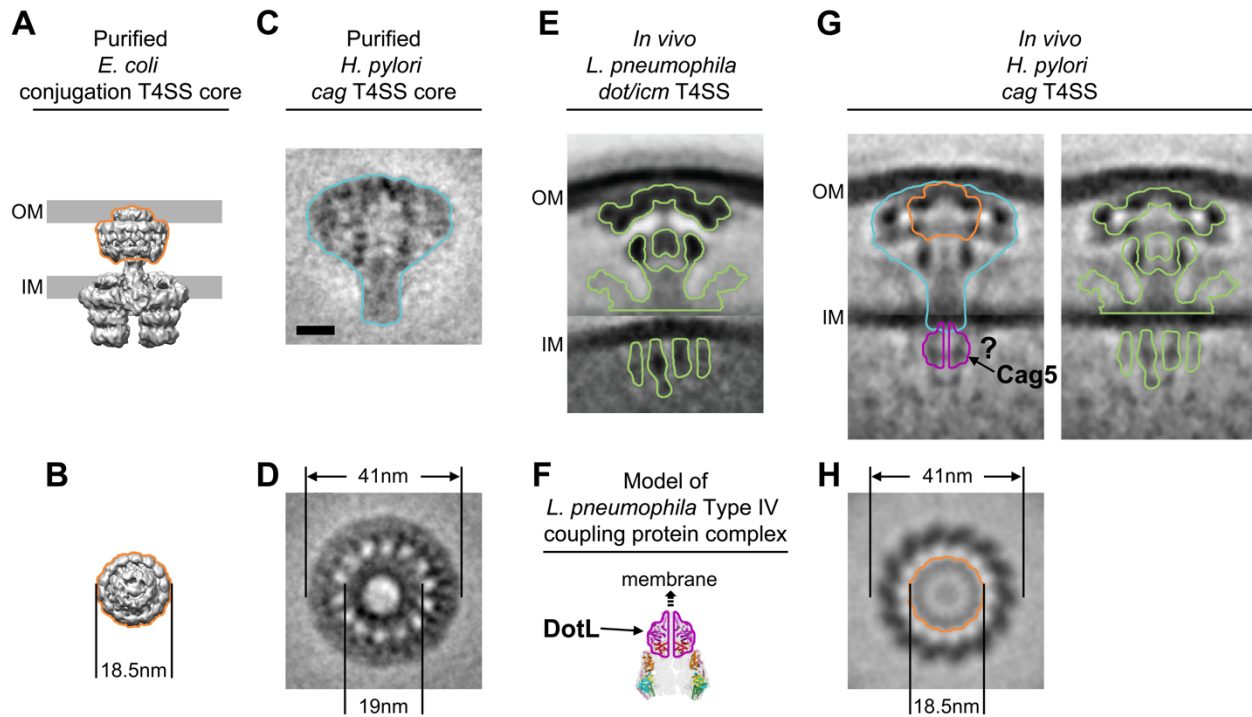

539

540 **Figure 4. Comparison of diverse T4SS machinery structures.** (A) Side and (B) top views of  
 541 the purified *E. coli* R388 conjugation system (reproduced from (15)). (C) Side and (D) top view  
 542 of immunopurified *cag* T4SS core complex particles (adapted and modified from (20)). (E) Side  
 543 view of the *L. pneumophila dot/icm* T4SS *in vivo* (19). (F) Model of the *L. pneumophila* DotL  
 544 coupling protein complex (30), with the DotL structure outlined in magenta. (G) Side and (H)  
 545 top view of the *cag* T4SS structure *in vivo* (present study). In (G), two duplicated side views are  
 546 shown for clearer labeling. Orange outline indicates the R388 core complex positioned within the  
 547 *cag* T4SS structure; blue outline indicates the position of the purified *cag* T4SS core complex  
 548 within the *in vivo* structure; magenta outline indicates the predicted location of the coupling  
 549 protein Cag5 based on the structure of its *L. pneumophila* homolog, DotL, shown in (F); green  
 550 outline indicates the *L. pneumophila dot/icm* T4SS structure superimposed on the *cag* T4SS  
 551 structure. Scale bar in (C) 10 nm, applies to all panels. See also Fig. S4 and S6.

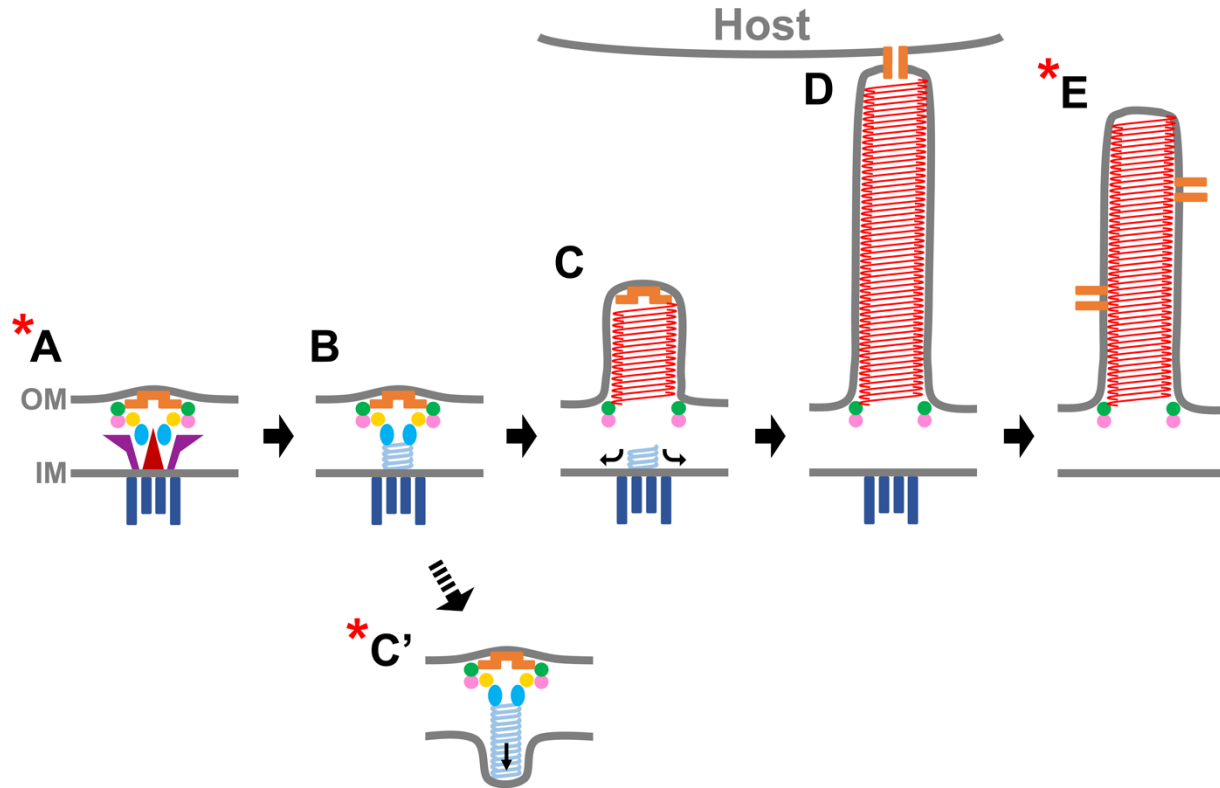

552

553 **Figure 5. Working model for biogenesis of the *cag* T4SS.** See Discussion for proposed  
554 identities and roles of structures. The starred structures (A, C', and E) are the long-lived states  
555 observed in the cryotomograms, while other stages of assembly are hypothesized.

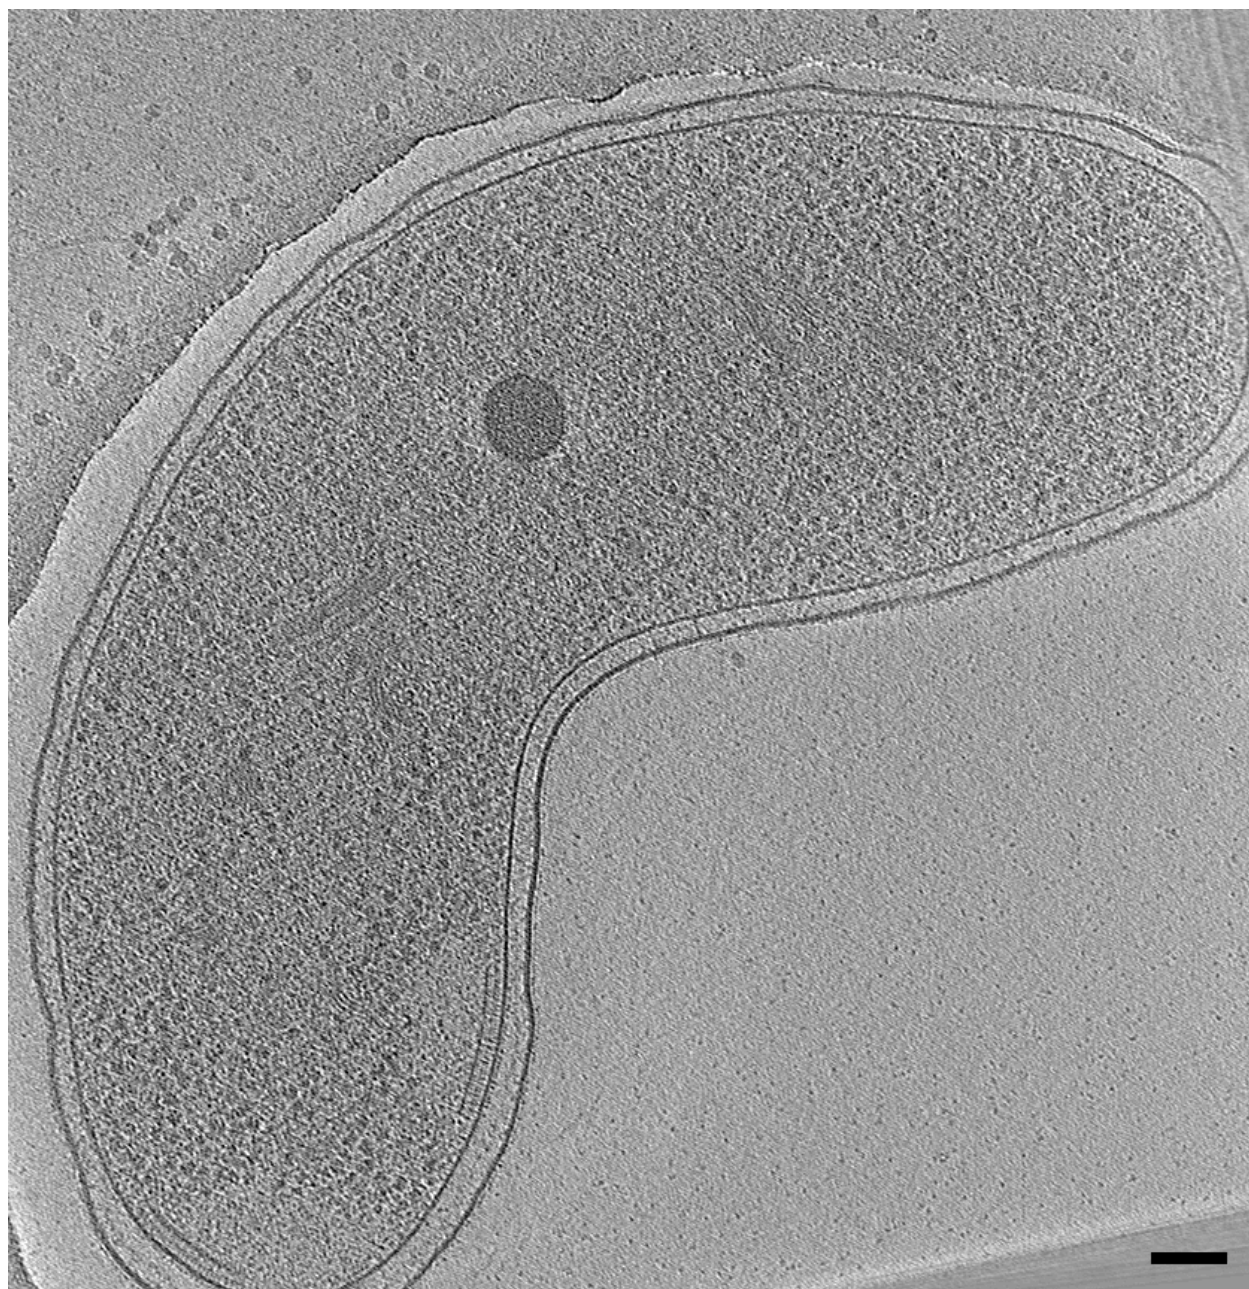

556

557 **Supplementary Figure 1. A tomographic slice of *H. pylori* without co-cultured with human**

558 **gastric epithelial cells. Scale bar 100 nm.**

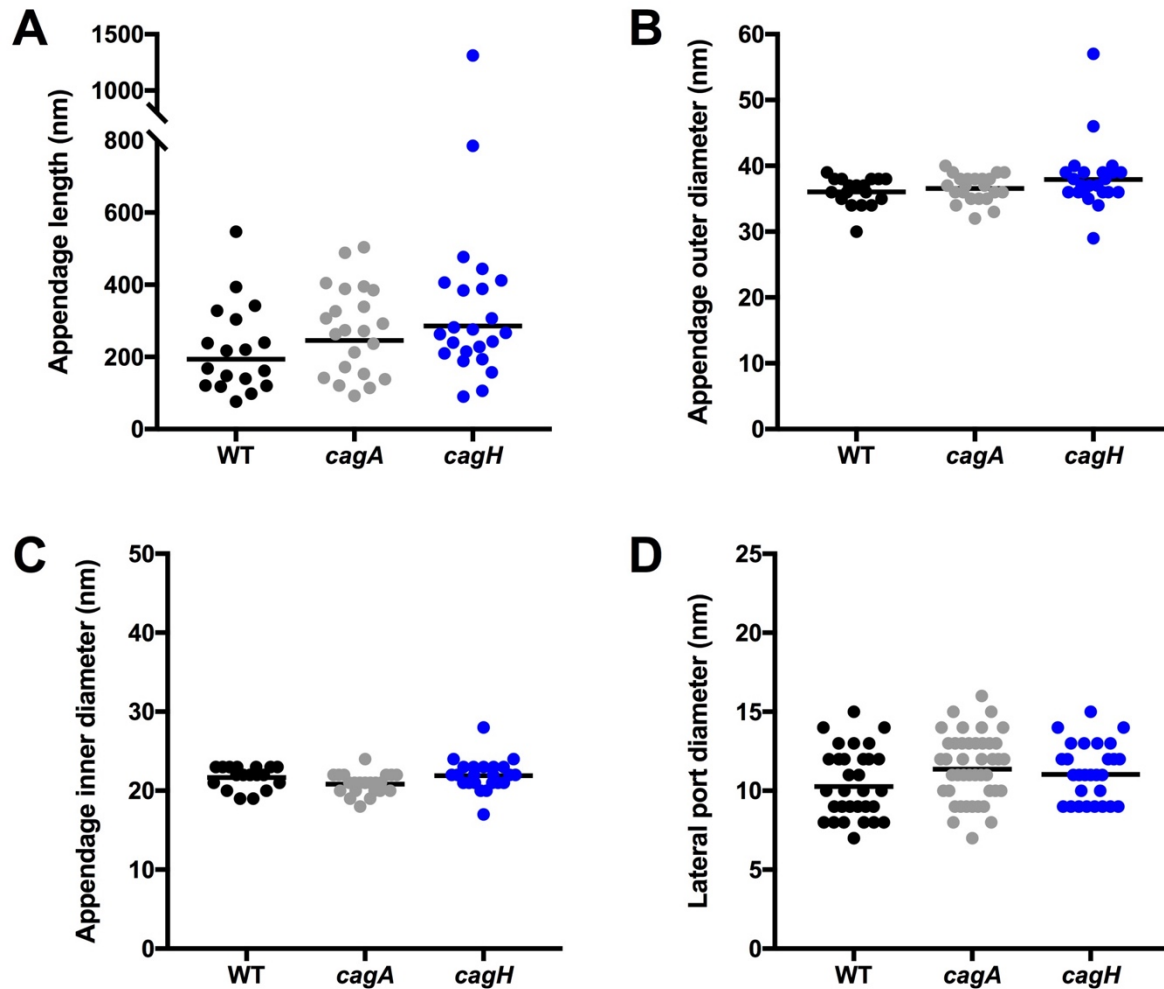

559

560 **Supplementary Figure 2. Dimensions of *H. pylori* membrane tubes.** (A) Tube length for each  
561 imaged strain. (B) Outer and (C) inner diameter of bacterial tube structures. (D) Width of lateral  
562 pipe-like conduits associated with some tubes. Dots in (A-C) represent the dimensions of  
563 individual tubes; dots in (D) represent the diameters of individual lateral ports. Lines represent the  
564 geometric mean of each distribution.



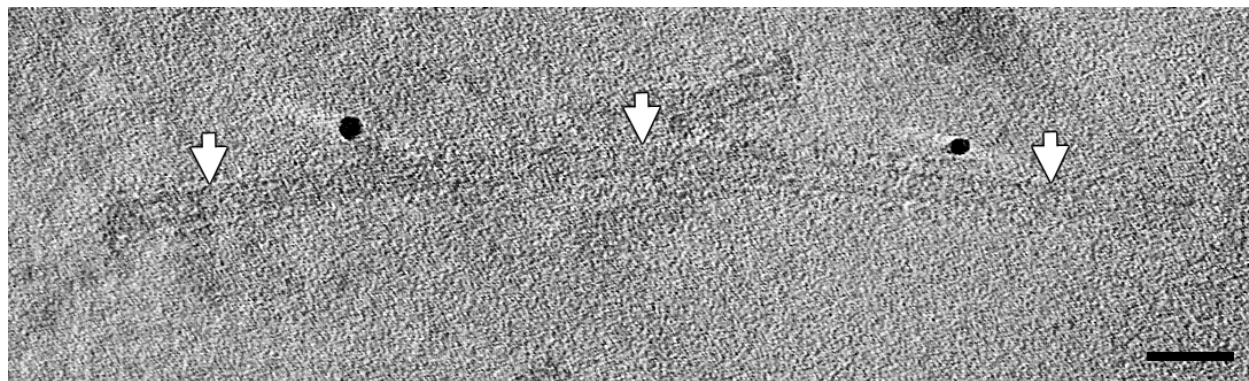

565

566 **Supplementary Figure 3.** A tomographic slice of a >1,300 nm long tube (arrows) captured on the

567 *H. pylori cagH* knockout strain in co-culture with human gastric epithelial cells. Smaller adjacent

568 tubes can be seen flanking the central, long tube. Scale bar 100 nm.

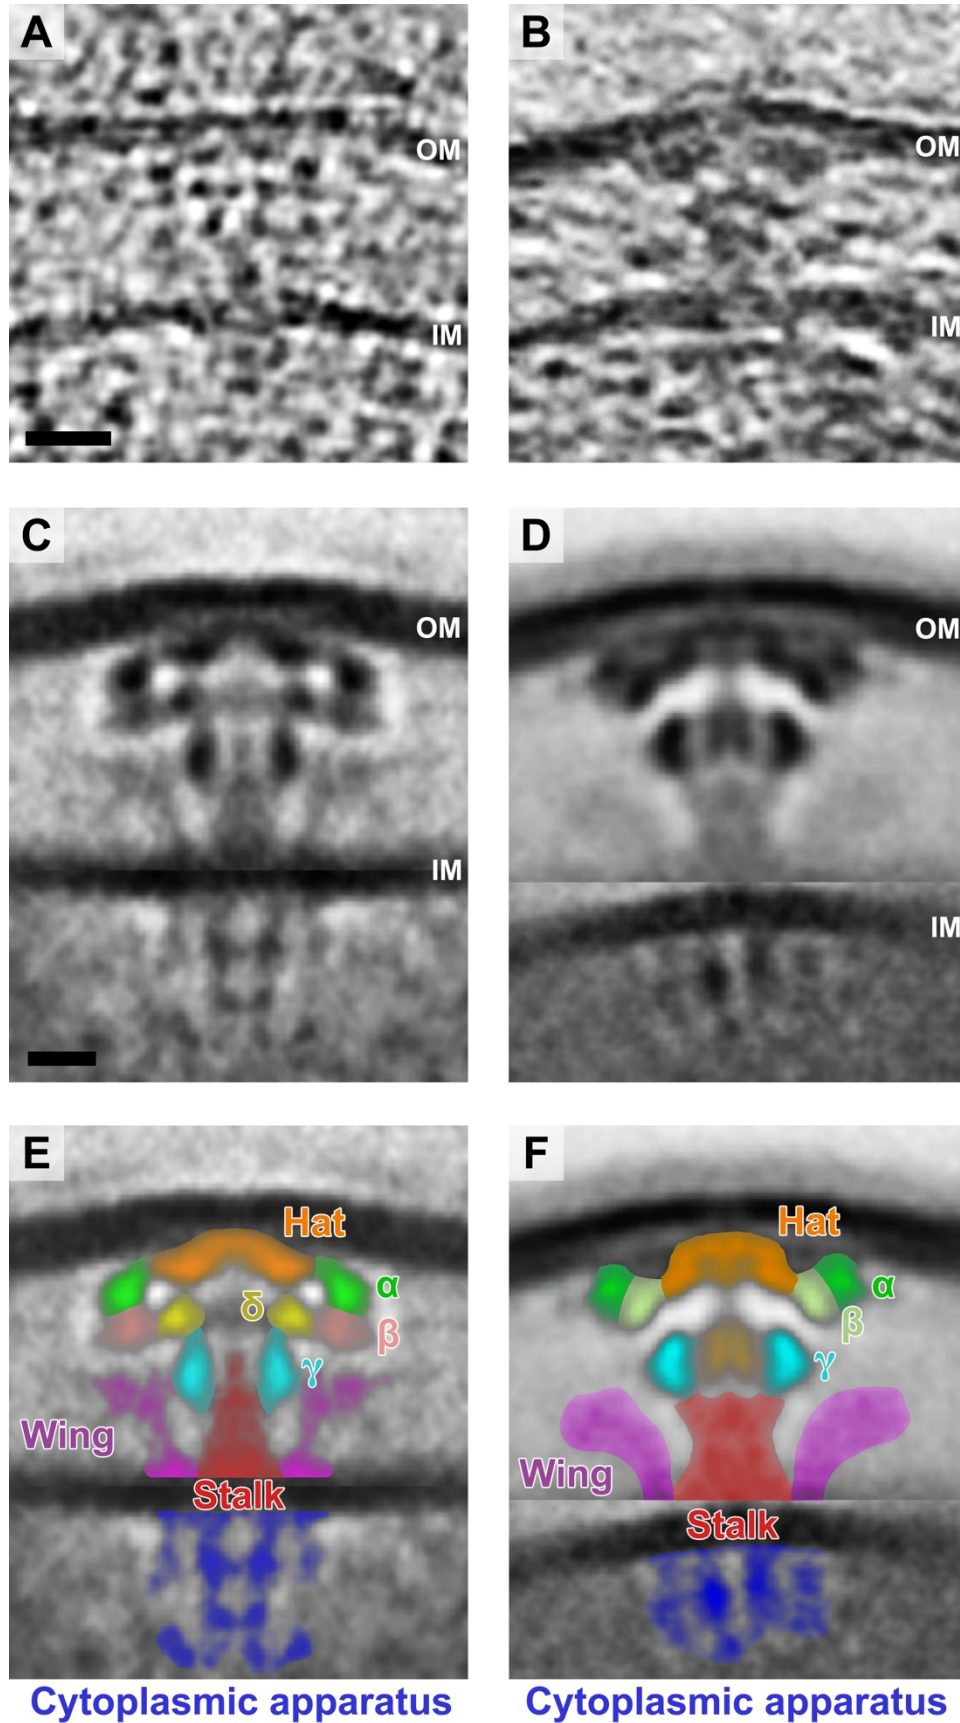

570 **Supplementary Figure 4. Schematic of structural features associated with the *cag* T4SS. (A)**  
571 Cryotomographic slice 7.8 nm thick through an individual *cag* T4SS particle in a tomogram of *H.*  
572 *pylori*. (B) Cryotomographic slice 7.8 nm thick through a *dot/icm* T4SS particle in a tomogram of  
573 *L. pneumophila*. (C) Subtomogram averages of the *cag* T4SS (this study) and (D) the *L.*  
574 *pneumophila dot/icm* T4SS (19). (E and F) Colorized densities observed in subtomogram averages  
575 shown in C and D, respectively. Scale bar in (A) 20 nm, applies to (A, B); scale bar in (C) 10 nm,  
576 applies to (C-F). OM, outer membrane; IM, inner membrane.

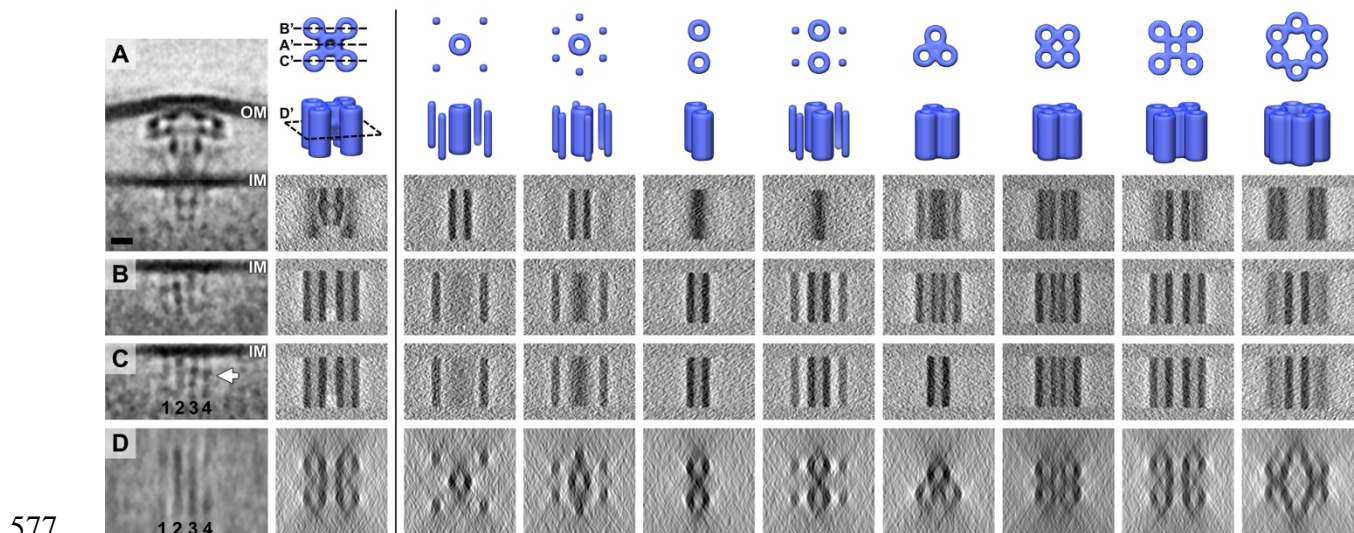

577

578 **Supplementary Figure 5. Modeling potential structures of the *cag* T4SS cytoplasmic**

579 **apparatus.** (A) Central slice of the subtomogram average of the *cag* T4SS from the *en face* view.

580 (B) Distal and (C) proximal off-center tomographic slices through the *en face* view of the *cag*

581 T4SS particle. (D) Cross-section of the cytoplasmic apparatus parallel to the inner membrane at

582 the position indicated by the white arrow in (C). From the second column onward, the top two

583 images are the top and side views of the candidate 3D models for the cytoplasmic apparatus. The

584 four tomographic slices below the 3D models in each column are the sections corresponding to the

585 first column (A-D). In the second column, A', B', C' and D' on the top two views of the 3D

586 representation indicate the locations of the tomographic slices shown in (A-D) through the object.

587 Comparing candidate structural models to the experimental data, we predict that the cytoplasmic

588 apparatus is comprised of a five-barrel arrangement. Scale bar 10 nm, applies to all panels. OM,

589 outer membrane; IM, inner membrane.

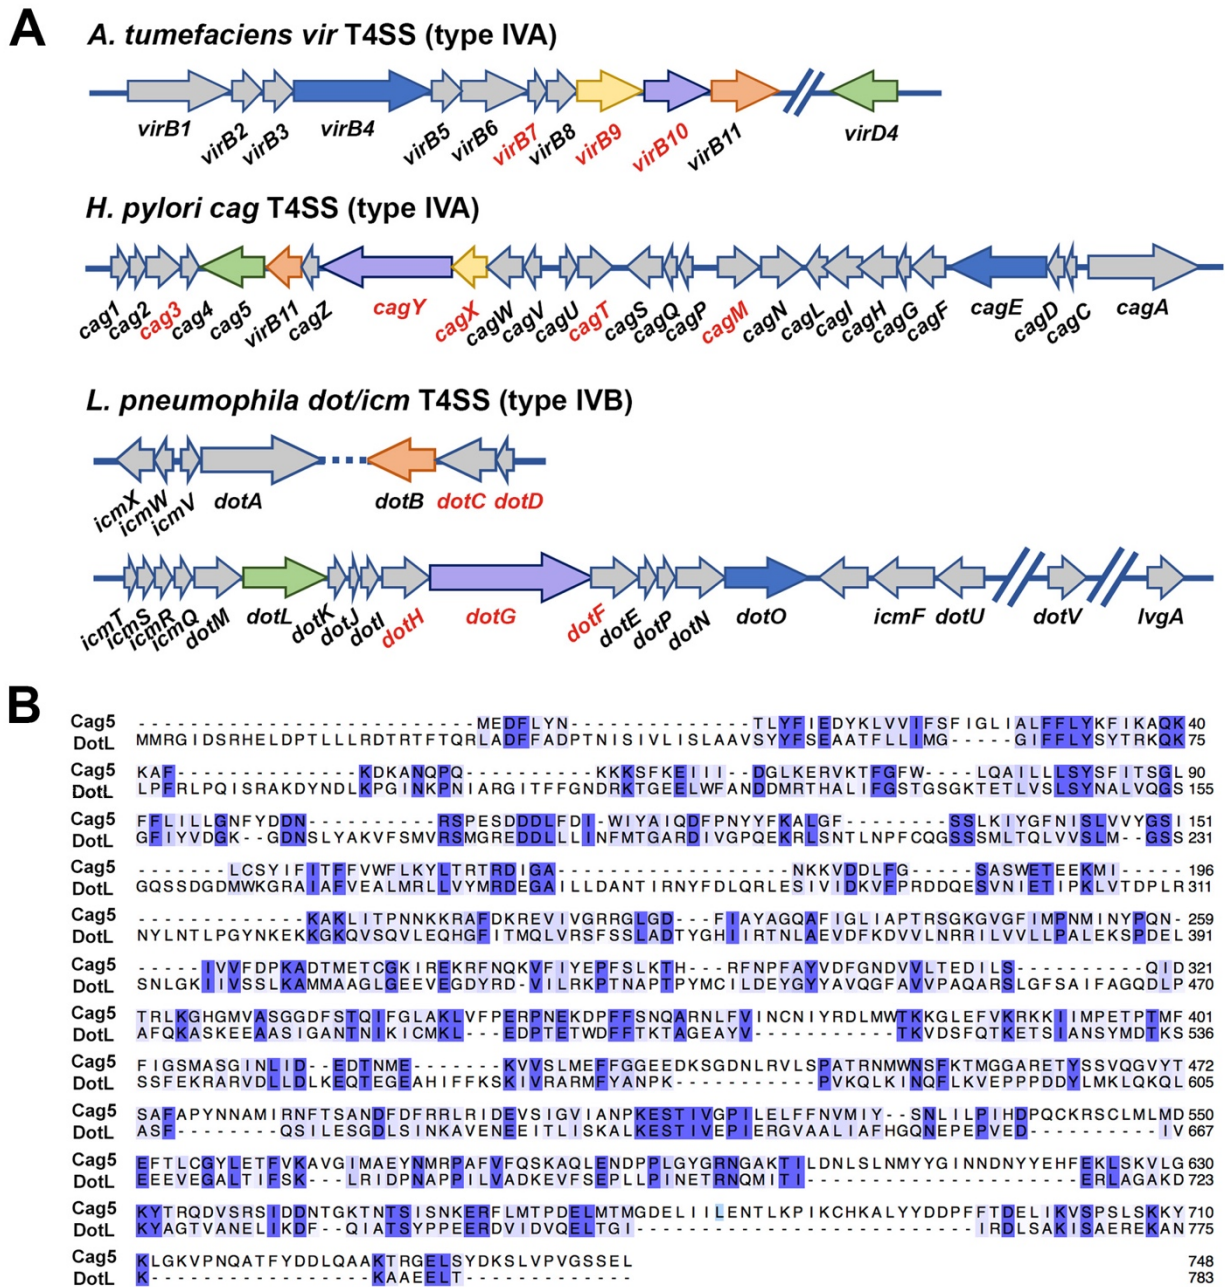

590

591 **Supplementary Figure 6. Genetic organization of T4SS-associated loci.** (A) Organization of *A.*  
592 *tumefaciens vir* genes, the *H. pylori cag* pathogenicity island, and *L. pneumophila dot/icm* gene  
593 regions. Colored arrows indicate recognized homologs in each T4SS. Genes encoding components  
594 of the presumed 'core complex' in each system are indicated by red text. (B) Protein sequence  
595 alignment of the VirD4 coupling proteins *H. pylori* Cag5 and *L. pneumophila* DotL. Protein

596 sequences were aligned using BLAST align, and aligned sequences were visualized using Jalview.

597 Numbers indicate the position of each residue in the pair-wise sequence alignment. Shading

598 indicates level of sequence conservation.
